# Supplementary material for: Thalamic amnesia after infarct: The role of the mammillothalamic tract and mediodorsal nucleus
Source: PubMed Central journal article supplement — Neurology. 2015 Dec 15;85(24):2107–15. doi: 10.1212/WNL.0000000000002226 (PMC4691690; doi:10.1212/wnl.0000000000002226), 2015-12-15
Supplement: supp_WNL.0000000000002226_Table_e-1.pdf [file supp_WNL.0000000000002226_Table_e-1.pdf]

**Table e-1.** Clinical report of the symptoms observed during the acute phase after stroke for the 12 patients.

|     | Visuo-motor symptoms | Motor symptoms                                   | Sensory symptoms                                      | Non amnesic cognitive symptoms                                                                                                | Amnesic symptoms                                        | Behavioral symptoms                      |
|-----|----------------------|--------------------------------------------------|-------------------------------------------------------|-------------------------------------------------------------------------------------------------------------------------------|---------------------------------------------------------|------------------------------------------|
| P1  |                      |                                                  |                                                       |                                                                                                                               | Verbal anterograde amnesia                              |                                          |
| P2  | Diplopia             | Right brachiofacial paralysis                    |                                                       | Anomia, "Strange" paraphasia, Arousal, Attentional deficit                                                                    | Verbal anterograde amnesia                              |                                          |
| P3  | Diplopia             | Right facial paralysis, Uncoordinated movements  |                                                       | Anomia                                                                                                                        |                                                         |                                          |
| P4  |                      | Right facial palsy, Right hemiplegia, Dysarthria |                                                       | Anomia                                                                                                                        | Verbal anterograde amnesia                              | Aggression, Agitation                    |
| P5  | Diplopia,            | Right facial palsy                               | Headache, Right hemisensory loss, Right auditory loss | Jargon aphasia                                                                                                                |                                                         | Agitation                                |
| P6  |                      |                                                  | Headache                                              | Jargon aphasia, Anomia, "Strange" paraphasia                                                                                  | Verbal anterograde and retrograde amnesia               | Emotional incontinence                   |
| P7  |                      | Gait instability                                 |                                                       | Arousal, Jargon                                                                                                               | Bradypsychia                                            |                                          |
| P8  | Diplopia             |                                                  |                                                       | Anomia, Anosognosia                                                                                                           |                                                         |                                          |
| P9  |                      | Vestibular syndrome                              | Headache                                              | Anomia, Anosognosia, Temporal and spatial disorientation                                                                      | Bradypsychia                                            | Emotional incontinence<br>Fatigue        |
| P10 |                      |                                                  |                                                       | Anomia, Paraphasia                                                                                                            | Verbal anterograde amnesia                              | Aggression, Emotional detachment, Apathy |
| P11 |                      |                                                  |                                                       | Paraphasia                                                                                                                    | Short-term memory, Spatial memory impairment            |                                          |
| P12 |                      |                                                  |                                                       | Attentional deficit, Anomia, Mental flexibility deficit, Initiation default, Anosognosia, Temporal and spatial disorientation | Verbal anterograde and retrograde amnesia, Bradypsychia | Emotional incontinence                   |
