# Supplementary material for: Thalamic amnesia after infarct: The role of the mammillothalamic tract and mediodorsal nucleus
Source: PubMed Central journal article supplement — Neurology. 2015 Dec 15;85(24):2107–15. doi: 10.1212/WNL.0000000000002226 (PMC4691690; doi:10.1212/wnl.0000000000002226), 2015-12-15
Supplement: supp_WNL.0000000000002226_Table_e-2.pdf [file supp_WNL.0000000000002226_Table_e-2.pdf]

**Table e-2.** Median (min, max) scores for verbal memory and naming tests per patient subgroup (iMTT, dMTT), and per subtest, using a permutation test. <sup>a</sup>  $p < .0001$  dMTT vs. Controls comparison. <sup>b</sup>  $p < .01$  iMTT vs. Controls comparison. <sup>c</sup>  $p < .05$  iMTT vs. Controls comparison. <sup>d</sup>  $p < .01$  dMTT vs. iMTT comparison. <sup>e</sup>  $p < .05$  dMTT vs. iMTT comparison.

| Tasks          | Subtests                           | dMTT patients<br>(n = 7)    | iMTT patients<br>(n = 5) | Healthy controls<br>(n = 25) |
|----------------|------------------------------------|-----------------------------|--------------------------|------------------------------|
| <b>MEMORY</b>  |                                    |                             |                          |                              |
| FCSRT          | - 3 free recalls /48               | 5 (2, 14) <sup>a, d</sup>   | 30 (18, 33) <sup>b</sup> | 38 (19, 45)                  |
|                | - 3 free and cued recalls /48      | 18 (7, 30) <sup>a, d</sup>  | 46 (41, 48)              | 48 (45, 48)                  |
|                | - Delayed free recall (20 min) /16 | 1 (0, 7) <sup>a, d</sup>    | 12 (7, 13) <sup>b</sup>  | 15 (10, 16)                  |
|                | - Delayed free + cued recall /16   | 7 (1, 11) <sup>a, d</sup>   | 16 (15, 16)              | 16 (15, 16)                  |
|                | - Yes/no recognition /48           | 41 (5, 45) <sup>a, e</sup>  | 48 (46, 48)              | 48 (47, 48)                  |
| Logical Memory | - Delayed recall (30 min) /50      | 8 (3, 20) <sup>a, d</sup>   | 27 (17, 37)              | 38 (24, 46)                  |
|                | - Yes/no recognition /30           | 18 (16, 25) <sup>a, d</sup> | 27 (26, 28)              | 28 (23, 30)                  |
